# Supplementary figures and images for: First-in-class metallo-PROTAC as an effective degrader of select Pt-binding proteins
Source: Royal Society of Chemistry journal article supplement (doi:10.1039/d3cc03340f), 2023-01-01

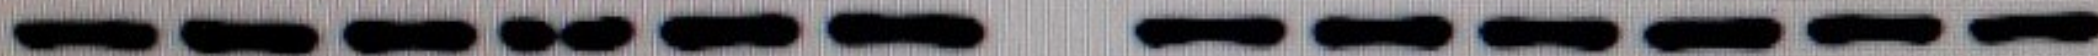

Supplement: d3cc03340f1.pdf [file d3cc03340f1.pdf]

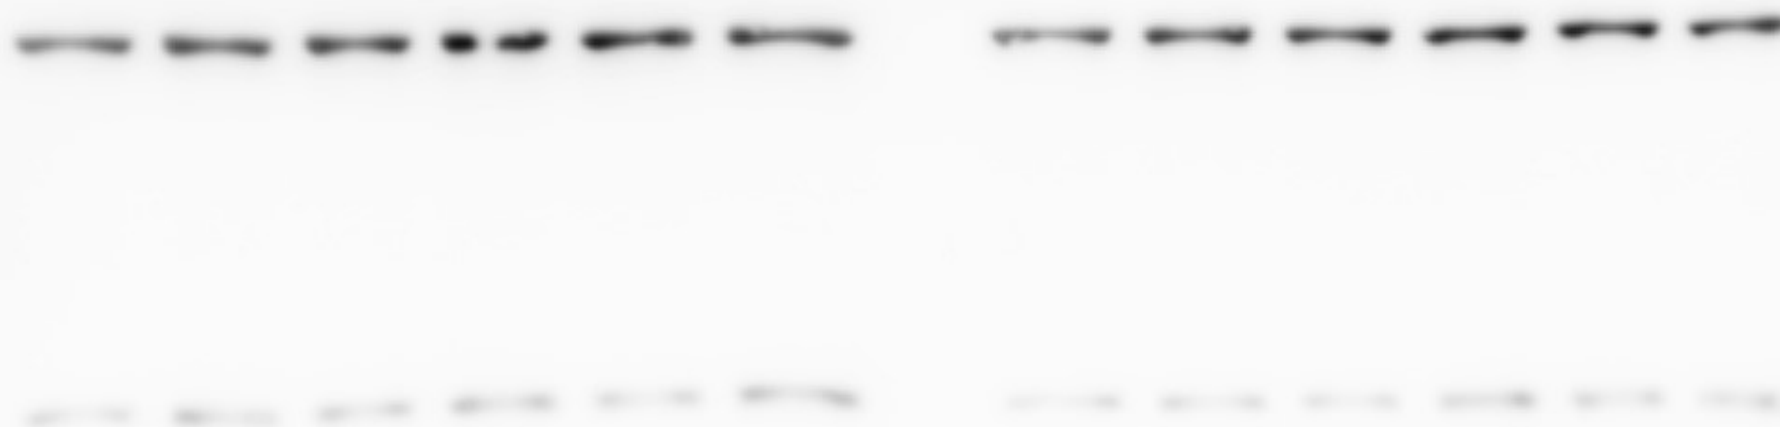

Supplement: d3cc03340f2.pdf [file d3cc03340f2.pdf]

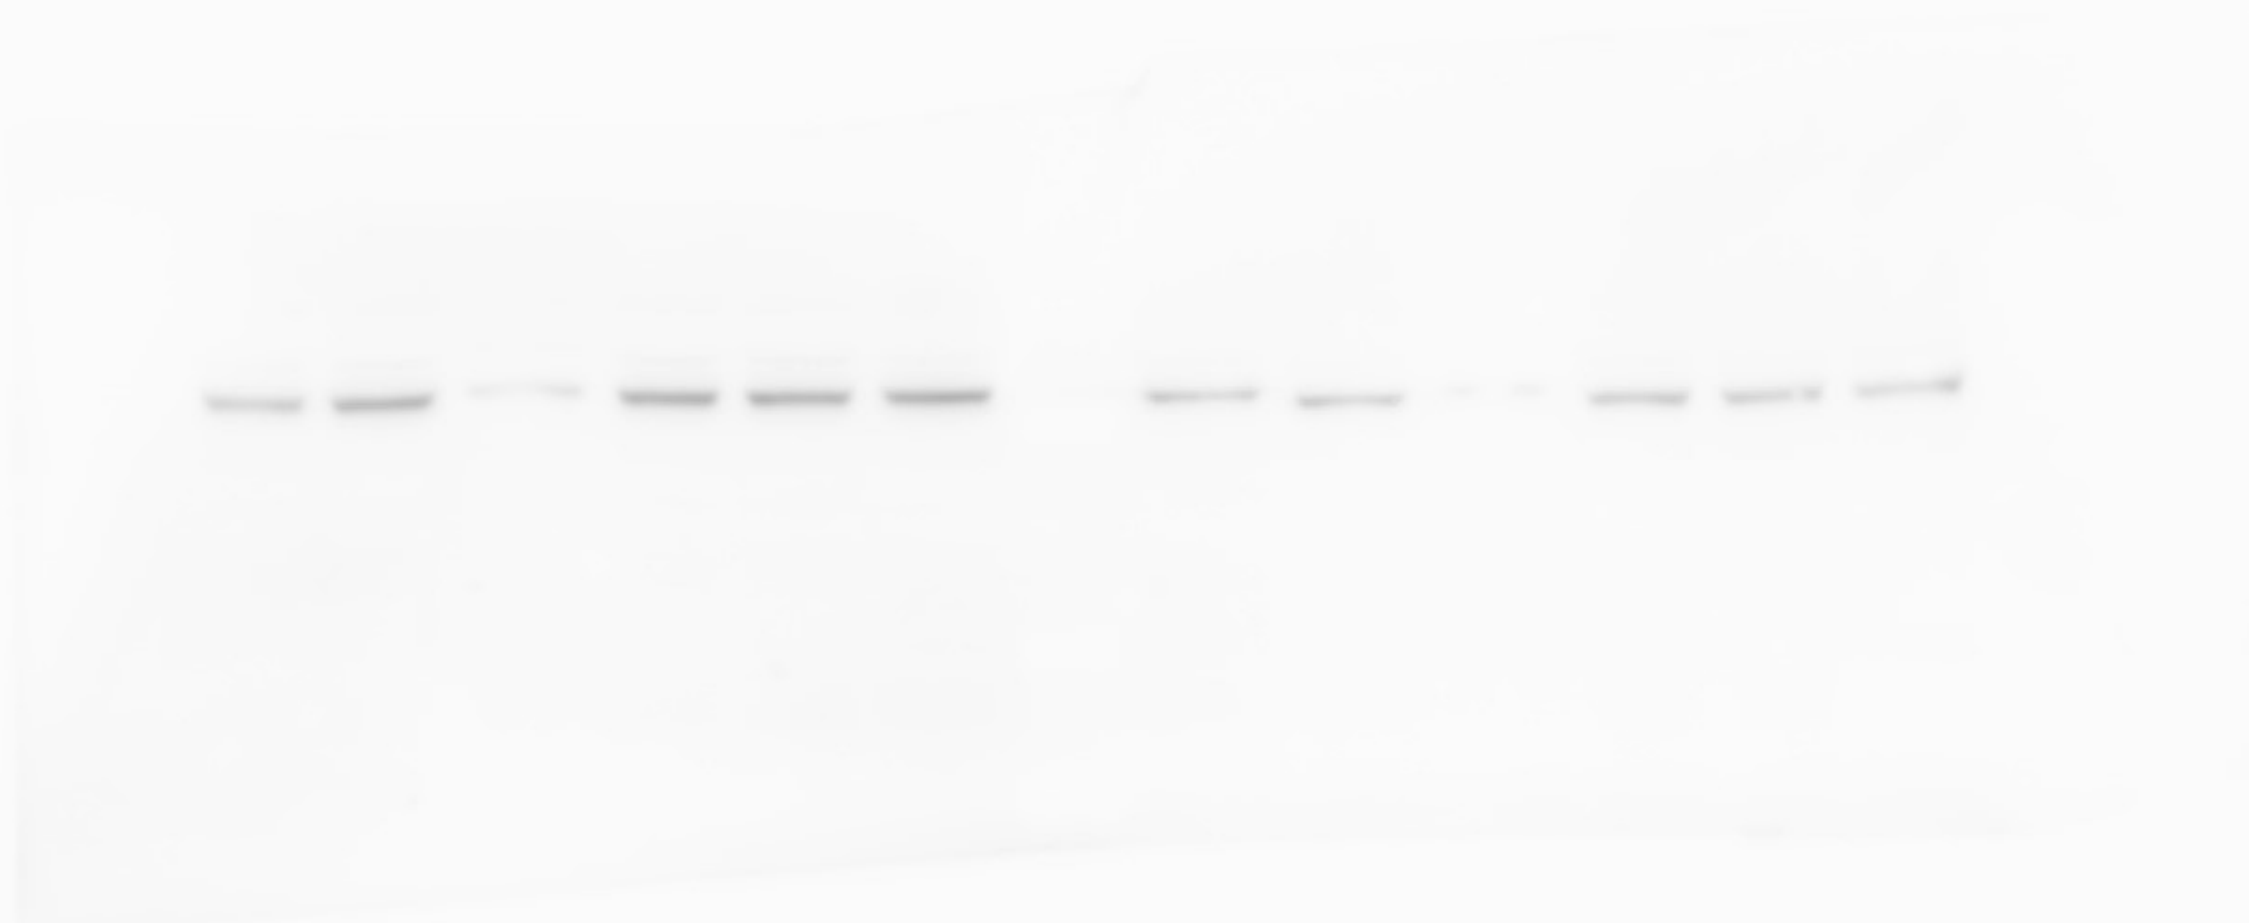

Supplement: d3cc03340f3.pdf [file d3cc03340f3.pdf]

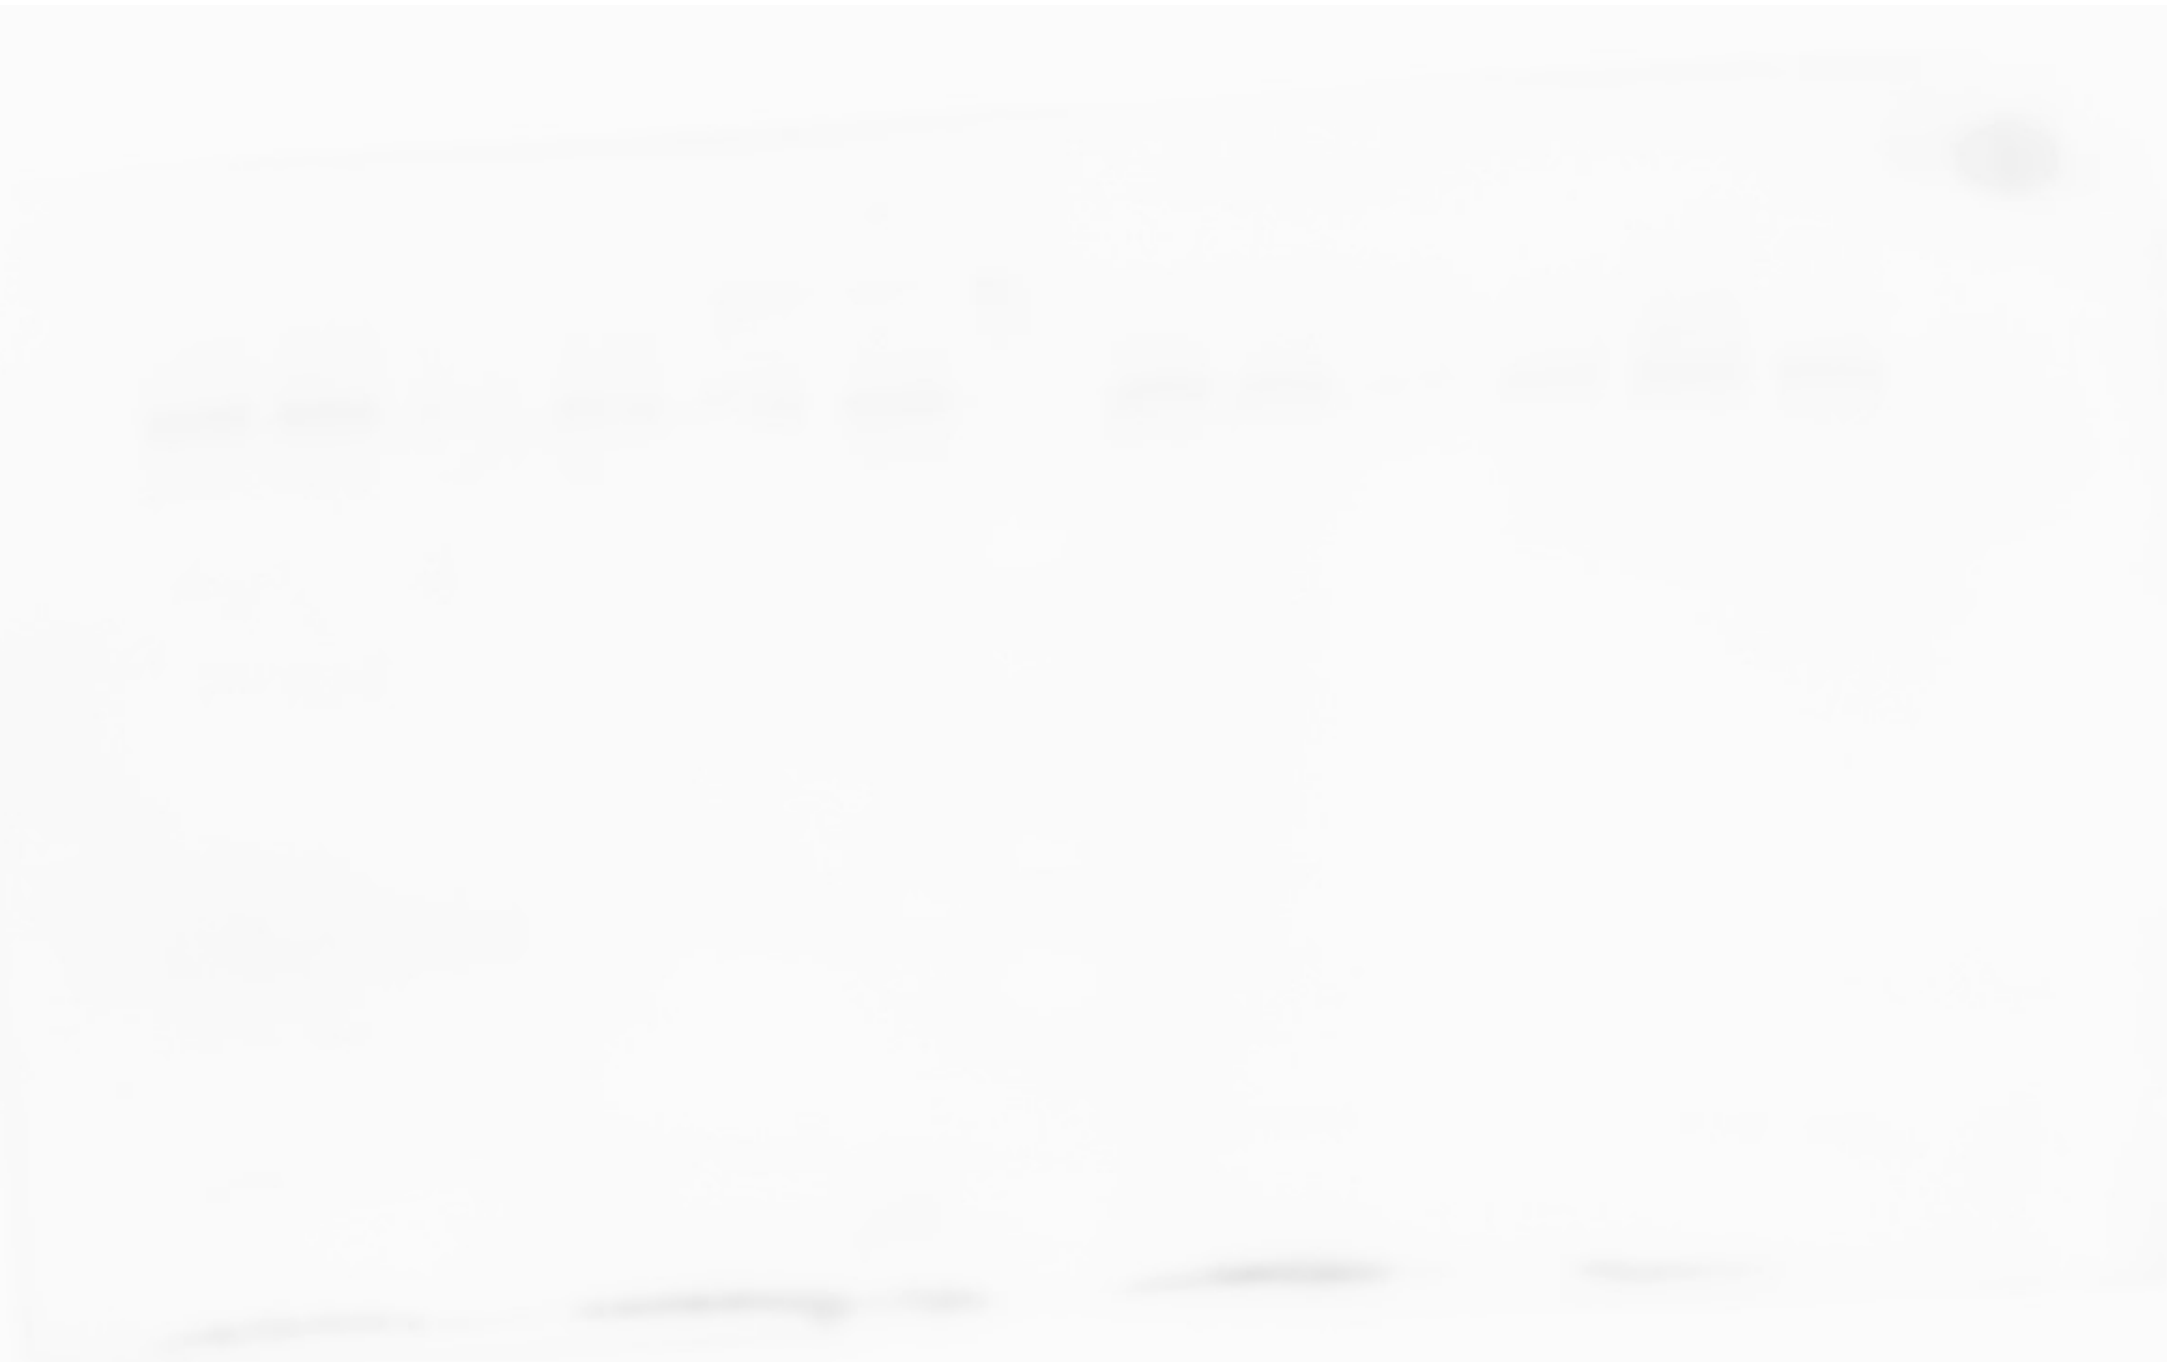

Supplement: d3cc03340f4.pdf [file d3cc03340f4.pdf]
